# Supplementary material for: Sodium-Containing Versus Sodium-Trace Preparations of IVIG for Children With Kawasaki Disease in The Acute Phase
Source: Research Square preprint supplement (doi:10.21203/rs.3.rs-213815/v1), 2021-02-22
Supplement: Supplementary file 1 [file 926cc094309cc783a5d51872.docx]

Supplemental Table 1. Patient characteristics and outcomes in the instrumental variable analyses

| Variables | Instrumental variable analyses | | |
| --- | --- | --- | --- |
|  | High-Na IVIG for previous patient (N=21991) | Low-Na IVIG for previous patient (N=19556) | ASD (%) |
| Age (years), mean (SD) | 1.9 (1.6) | 1.9 (1.6) | 2.9 |
| Male sex, n (%) | 12659 (57.6) | 11313 (57.8) | 1.6 |
| Weight (kg), mean (SD) | 11.6 (5.1) | 11.7 (3.8) | 0.5 |
| Height (cm), mean (SD) | 75.1 (31.7) | 71.8 (35.3) | 2.2 |
| Hospital days of illness at initial IVIG, median (IQR) | 2.0 (1.0, 2.0) | 2.0 (1.0, 3.0) | 4.0 |
| Type of hospital, n (%) |  |  |  |
| Academic hospital | 4364 (21.3) | 2723 (14.6) | 24.5 |
| Complex chronic conditions, n (%) |  |  |  |
| 0–1 | 21188 (96.3) | 18902 (96.7) | 2.7 |
| ≥2 | 803 (3.7) | 654 (3.3) | 2.7 |
| Transportation by ambulance, n (%) | 521 (2.4) | 406 (2.1) | 0.6 |
| ADL at admission, mean (SD) | 33.5 (37.3) | 34.2 (37.2) | 1.5 |
| Japan Coma Scale at admission, n (%) |  |  |  |
| Alert | 21805 (99.2) | 19382 (99.1) | 1.6 |
| Not alert | 186 (0.8) | 174 (0.9) | 1.6 |
| Transportation from other hospital, n (%) | 16603 (75.5) | 14390 (73.6) | 2.5 |
| Fiscal year, n (%) |  |  |  |
| 2010 | 1212 (5.5) | 1278 (6.5) | 6.9 |
| 2011 | 2613 (11.9) | 2362 (12.1) | 4.1 |
| 2012 | 3524 (16.0) | 2889 (14.8) | 9.5 |
| 2013 | 3883 (17.7) | 2900 (14.8) | 8.6 |
| 2014 | 4591 (20.9) | 3227 (16.5) | 6.5 |
| 2015 | 3427 (15.6) | 3578 (18.3) | 10.3 |
| 2016 | 2741 (12.5) | 3322 (17.0) | 14.5 |
| Additional treatment, n (%) | 3553 (16.2) | 2999 (15.3) | 0.0 |
| Hospital volume, n (%) |  |  |  |
| Low (1–16.7) | 7025 (31.9) | 6340 (32.4) | 10.0 |
| Middle (16.8–31.5) | 7240 (32.9) | 6728 (34.4) | 12.5 |
| High (≥31.6) | 7726 (35.1) | 6488 (33.2) | 2.0 |
| Outcomes |  |  |  |
| Proportion of CAAs (%) | 3.1 | 3.1 | 2.9 |
| Proportion of IVIG resistance (%) | 16.9 | 17.9 | 3.9 |
| Length of stay (days), mean (SD) | 11.8 (8.3) | 11.7 (8.4) | 2.1 |
| Medical cost (USD), mean (SD) | 8007 (5620) | 7852 (5320) | 3.0 |

ADL, activities of daily living; ASD, absolute standardized difference; CAAs, coronary artery abnormalities; IQR, interquartile range; IVIG, intravenous immunoglobulin; SD, standard deviation; USD, United States dollars.
